# Supplementary material for: Burnout syndrome among medical residents: A systematic review and meta-analysis
Source: PubMed Central journal article supplement (PMC6231624; doi:10.1371/journal.pone.0206840), 2018-11-12
Supplement: pone.0206840.s002.pdf [file pone.0206840.s002.pdf]

Detailed Search Criteria for <https://www.ncbi.nlm.nih.gov/pubmed>:

*((((((medical resident) OR resident) OR residency training) OR residency) OR  
(internship and residency))) AND (((burnout) OR burnout syndrome) OR  
professional burnout*

No filters.
