# Supplementary material for: Burnout syndrome among medical residents: A systematic review and meta-analysis
Source: PLOS journal article supplement (doi:10.1371/journal.pone.0206840), 2018-11-12

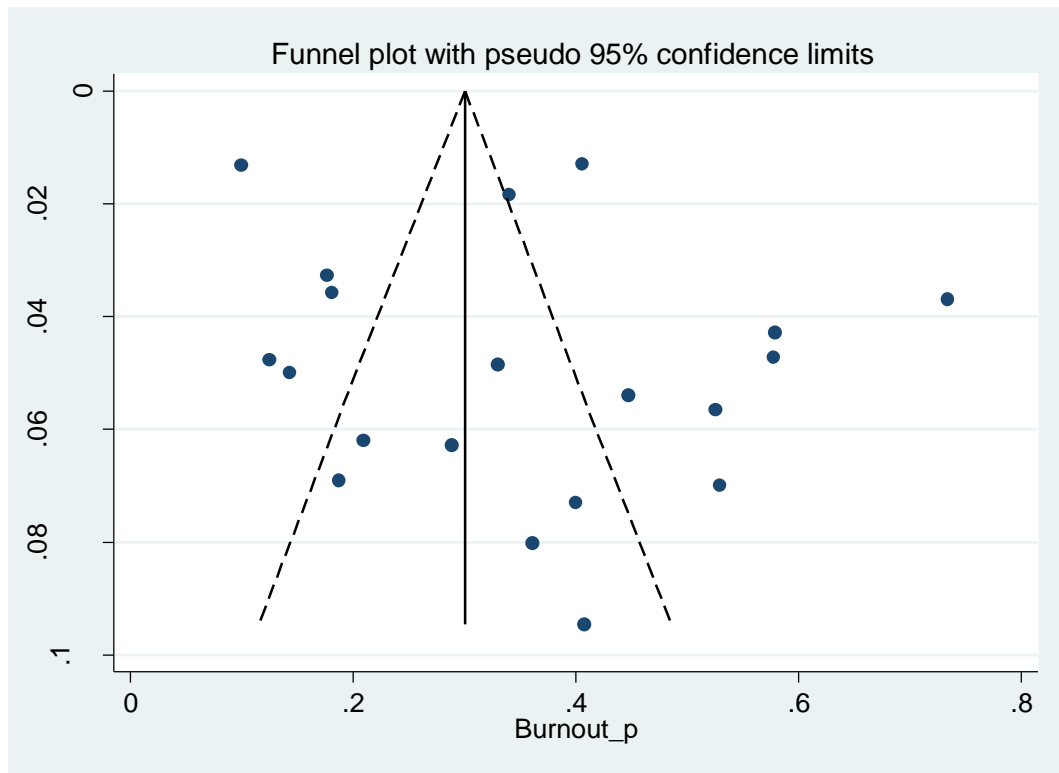

Supplement: S3 (10.1371/journal.pone.0206840.s003) [file journal.pone.0206840.s003]
